# Supplementary material for: Investigation of metal–organic frameworks and fluorocarbon refrigerants promising for adsorption cooling systems
Source: Royal Society of Chemistry journal article supplement (doi:10.1039/d4cp04816d), 2025-01-01
Supplement: d4cp04816d1.pdf [file d4cp04816d1.pdf]

## SUPPORTING INFORMATION

### **Investigation of Metal-organic Frameworks and Fluorocarbon Refrigerants Promising for Adsorption Cooling Systems**

Dipankar Singha, Debansh Mohapatra, and Malay Kumar Rana\*

Department of Chemical Sciences, Indian Institute of Science Education and Research  
(IISER), Berhampur, Berhampur 760010, Odisha, India

\*Corresponding author Email: [mrana@iiserbpr.ac.in](mailto:mrana@iiserbpr.ac.in)

**Table S1:** The Lennard-Jones parameters of the C<sub>2</sub>F<sub>4</sub> molecule from the Universal Force Field (UFF).

| Atoms | Potential     | $\epsilon/k_B$ (K) | $\sigma$ (Å) |
|-------|---------------|--------------------|--------------|
| C1    | Lennard-Jones | 47.8562            | 3.47299      |
| C2    | Lennard-Jones | 47.8562            | 3.47299      |
| F1    | Lennard-Jones | 36.4834            | 3.0932       |
| F2    | Lennard-Jones | 36.4834            | 3.0932       |
| F3    | Lennard-Jones | 36.4834            | 3.0932       |
| F4    | Lennard-Jones | 36.4834            | 3.0932       |

**Table S2:** The Lennard-Jones parameters of the C<sub>2</sub>F<sub>6</sub> molecule obtained from the TraPPE force field.

| Atoms | Potential     | $\epsilon/k_B$ (K) | $\sigma$ (Å) |
|-------|---------------|--------------------|--------------|
| CF3   | Lennard-Jones | 87.0               | 4.360        |
| CF3   | Lennard-Jones | 87.0               | 4.360        |

**Table S2:** The Lennard-Jones parameters of the N<sub>2</sub> molecule taken from UFF.

| Atoms | Potential     | $\epsilon/k_B$ (K) | $\sigma$ (Å) |
|-------|---------------|--------------------|--------------|
| N_n2  | Lennard-Jones | 38.298             | 3.306        |
| N_com | none          |                    |              |

**Table S3:** The Lennard-Jones parameters of the MOF atoms taken from UFF.

| Atoms | Potential     | $\epsilon/k_B$ (K) | $\sigma$ (Å) |
|-------|---------------|--------------------|--------------|
| O     | Lennard-Jones | 48.1581            | 3.03315      |
| N     | Lennard-Jones | 38.9492            | 3.26256      |
| C     | Lennard-Jones | 47.8562            | 3.47299      |
| B     | Lennard-Jones | 47.8058            | 3.58141      |
| P     | Lennard-Jones | 161.03             | 3.69723      |
| S     | Lennard-Jones | 173.107            | 3.59032      |
| Cl    | Lennard-Jones | 142.562            | 3.51932      |
| Br    | Lennard-Jones | 186.191            | 3.51905      |

|         |               |         |         |
|---------|---------------|---------|---------|
| H       | Lennard-Jones | 7.64893 | 2.84642 |
| Zn      | Lennard-Jones | 62.3992 | 2.46155 |
| Be      | Lennard-Jones | 42.7736 | 2.44552 |
| Cr      | Lennard-Jones | 7.54829 | 2.69319 |
| Fe      | Lennard-Jones | 6.54185 | 2.5943  |
| Mn      | Lennard-Jones | 6.54185 | 2.63795 |
| Cu      | Lennard-Jones | 2.5161  | 3.11369 |
| Co      | Lennard-Jones | 7.04507 | 2.55866 |
| Ga      | Lennard-Jones | 208.836 | 3.90481 |
| Ti      | Lennard-Jones | 8.55473 | 2.8286  |
| Sc      | Lennard-Jones | 9.56117 | 2.93551 |
| V       | Lennard-Jones | 8.05151 | 2.80099 |
| Ni      | Lennard-Jones | 7.54829 | 2.52481 |
| Zr      | Lennard-Jones | 34.7221 | 2.78317 |
| Mg      | Lennard-Jones | 55.8574 | 2.69141 |
| Ne      | Lennard-Jones | 21.1352 | 2.88918 |
| Ag      | Lennard-Jones | 18.1159 | 2.80455 |
| In      | Lennard-Jones | 301.428 | 3.97608 |
| Cd      | Lennard-Jones | 114.734 | 2.53728 |
| Sb      | Lennard-Jones | 225.946 | 3.93777 |
| Te      | Lennard-Jones | 200.281 | 3.98232 |
| Al      | Lennard-Jones | 155.998 | 3.91105 |
| Si      | Lennard-Jones | 155.998 | 3.80414 |
| He      | Lennard-Jones | 10.9    | 2.64    |
| CH4_sp3 | Lennard-Jones | 158.5   | 3.72    |
| CH3_sp3 | Lennard-Jones | 108.0   | 3.76    |
| CH2_sp3 | Lennard-Jones | 56.0    | 3.96    |
| CH_sp3  | Lennard-Jones | 17.0    | 4.67    |
| C_sp3   | Lennard-Jones | 0.8     | 6.38    |
| H_com   | Lennard-Jones | 36.7    | 2.958   |
| H_h2    | none          |         |         |
| O_co2   | Lennard-Jones | 85.671  | 3.017   |
| C_co2   | Lennard-Jones | 29.933  | 2.745   |
| C_benz  | Lennard-Jones | 30.70   | 3.60    |
| H_benz  | Lennard-Jones | 25.45   | 2.36    |
| N_n2    | Lennard-Jones | 38.298  | 3.306   |
| N_com   | none          |         |         |
| Ow      | Lennard-Jones | 89.633  | 3.097   |
| N_dmf   | Lennard-Jones | 80.0    | 3.2     |
| Co_dmf  | Lennard-Jones | 50.0    | 3.7     |
| Cm_dmf  | Lennard-Jones | 80.0    | 3.8     |
| O_dmf   | Lennard-Jones | 100.0   | 2.96    |
| H_dmf   | Lennard-Jones | 8.0     | 2.2     |
| Ar      | Lennard-Jones | 124.070 | 3.380   |
| Kr      | Lennard-Jones | 166.4   | 3.636   |
| Xe      | Lennard-Jones | 221.0   | 4.1     |

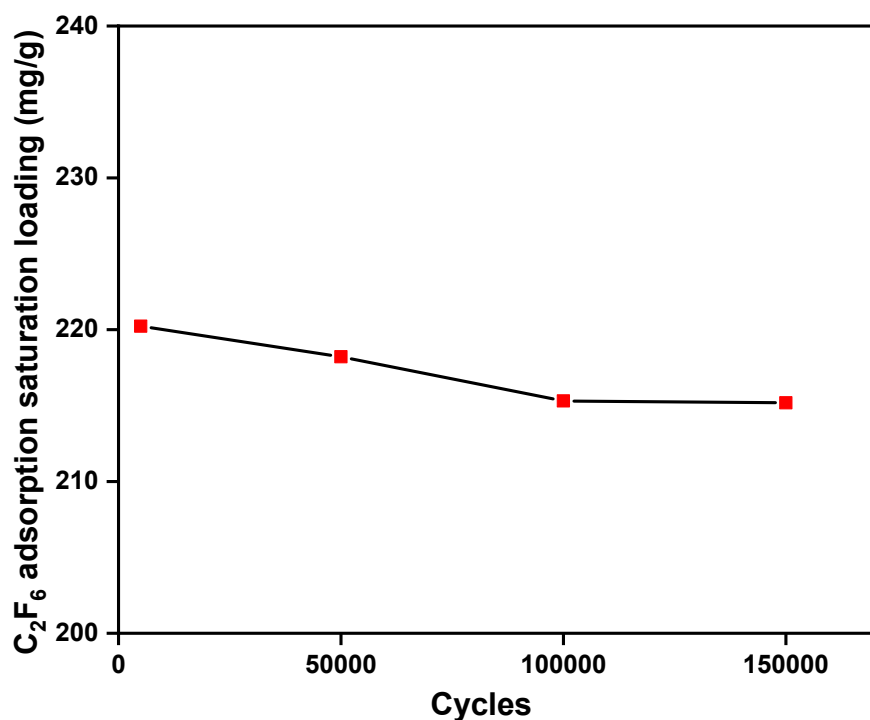

**Figure S1:** Convergence test of C<sub>2</sub>F<sub>6</sub> adsorption data (uptake) on unit cell of MOF-5 for the Grand Canonical Monte Carlo (GCMC) simulation cycles performed.

**Table S4:** Computed pore diameter, surface area, and accessible volume of selected MOFs. D<sub>i</sub> = included sphere, D<sub>f</sub> = the largest free sphere, D<sub>if</sub> = the largest free sphere.

| Sl. No. | MOF       | Pore diameter  |                |                 | Surface area (m <sup>2</sup> /g) | Accessible volume (cm <sup>3</sup> /g) |
|---------|-----------|----------------|----------------|-----------------|----------------------------------|----------------------------------------|
|         |           | D <sub>i</sub> | D <sub>f</sub> | D <sub>if</sub> |                                  |                                        |
| 1       | IRMOF-1   | 15.09          | 14.83          | 7.97            | 3770.17                          | 0.92                                   |
| 2       | F-MOF-6   | 6.48           | 6.39           | 4.67            | 1789.94                          | 0.15                                   |
| 3       | MOF-177   | 17.38          | 12.35          | 11.17           | 4885.52                          | 2.01                                   |
| 4       | MOF-200   | 17.97          | 17.07          | 15.8            | 4556.99                          | 2.89                                   |
| 5       | MOF-205   | 22.81          | 22.79          | 8.54            | 4207.14                          | 1.57                                   |
| 6       | MOF-210   | 28.01          | 27.6           | 12.18           | 5440.24                          | 3.06                                   |
| 7       | MOF-801   | 7.65           | 7.65           | 3.33            | 1472.67                          | 0.09                                   |
| 8       | MOF-1011  | 5.08           | 4.29           | 2.78            | 1073.4                           | 0.04                                   |
| 9       | MOP-1     | 10.98          | 10.98          | 6.22            | 2692.82                          | 0.35                                   |
| 10      | Co-MOF-74 | 1.58           | 1.34           | 0.83            | 0                                | 0                                      |
| 11      | Mn-MOF-74 | 3.15           | 3.14           | 1.3             | 0                                | 0                                      |
| 12      | Zn-MOF-74 | 2.63           | 2.18           | 1.07            | 0                                | 0                                      |
| 13      | Ni-MOF-74 | 2.91           | 2.88           | 1.27            | 0                                | 0                                      |
| 14      | F-MOF-1   | 3.04           | 3.02           | 1.77            | 0                                | 0                                      |
| 15      | CD-MOF    | 16.15          | 16.15          | 6.68            | 1536.75                          | 0.23                                   |

|    |                                    |       |       |       |         |      |
|----|------------------------------------|-------|-------|-------|---------|------|
| 16 | IRMOF-5                            | 19.81 | 19.81 | 11.82 | 3313.48 | 1.06 |
| 17 | IRMOF-74                           | 23.43 | 23.43 | 22.77 | 3292.09 | 1.14 |
| 18 | IRMOF-76                           | 25.06 | 25.05 | 12.95 | 5514.54 | 2.51 |
| 19 | IRMOF-77                           | 11.59 | 11.59 | 6.85  | 1768.68 | 0.25 |
| 20 | LIC-1                              | 5.32  | 5.32  | 1.61  | 0       | 0    |
| 21 | CPL-2                              | 18.37 | 18.35 | 18.15 | 4544.58 | 1.92 |
| 22 | HKUST-1                            | 8.62  | 8.57  | 2.91  | 1787.92 | 0.14 |
| 23 | MIL-47                             | 7.54  | 7.54  | 7     | 2295.36 | 0.26 |
| 24 | MIL-53                             | 2.12  | 2.11  | 1.17  | 0       | 0    |
| 25 | MIL-88                             | 5.66  | 5.63  | 2.34  | 0       | 0    |
| 26 | MIL-101                            | 16.94 | 16.94 | 12.83 | 3095.31 | 0.64 |
| 27 | UiO-66                             | 8.73  | 8.73  | 3.84  | 1257.77 | 0.09 |
| 28 | UiO-67                             | 11.64 | 11.64 | 3.48  | 1929.42 | 0.21 |
| 29 | UiO-68                             | 17.84 | 17.84 | 5.56  | 4086.41 | 0.74 |
| 30 | ZIF-1                              | 2.69  | 2.68  | 1.56  | 0       | 0    |
| 31 | ZIF-2                              | 3.16  | 1.88  | 1.39  | 0       | 0    |
| 32 | ZIF-4                              | 4.55  | 4.42  | 2.57  | 1359.06 | 0.05 |
| 33 | ZIF-5                              | 3.87  | 3.86  | 2.15  | 0       | 0    |
| 34 | ZIF-7                              | 5.18  | 4.58  | 2.42  | 825.73  | 0.04 |
| 35 | ZIF-8                              | 11.39 | 11.39 | 3.44  | 2024.67 | 0.28 |
| 36 | ZIF-23                             | 2.24  | 2.23  | 1.43  | 0       | 0    |
| 37 | ZIF-67                             | 11.37 | 11.37 | 3.29  | 2017.22 | 0.27 |
| 38 | ZIF-70                             | 15.28 | 15.28 | 13.37 | 2116.97 | 0.36 |
| 39 | ZIF-202                            | 1.86  | 1.6   | 1.06  | 0       | 0    |
| 40 | Cd-MOF-2                           | 2.45  | 2.39  | 1.12  | 0       | 0    |
| 41 | CN-HTB'                            | 27.43 | 27.42 | 17.55 | 5129.36 | 3.37 |
| 42 | CPM-7                              | 10.5  | 10.5  | 3.97  | 1919.12 | 0.14 |
| 43 | Cu <sub>2</sub> (pzd) <sub>2</sub> | 2.77  | 0     | 0     | 0       | 0    |
| 44 | DUT-49                             | 24.85 | 24.85 | 13.11 | 4840.96 | 2.25 |
| 45 | F-MOF-11                           | 2.78  | 2.78  | 1.75  | 0       | 0    |
| 46 | IRMOF-3                            | 14.93 | 14.93 | 6.64  | 3102.13 | 0.63 |
| 47 | IRMOF-16                           | 16.21 | 16.21 | 8.58  | 5345.55 | 0.76 |
| 48 | IRMOF-18                           | 14.24 | 14.24 | 5.62  | 2700.48 | 0.49 |
| 49 | IRMOF-74-II                        | 16.4  | 16.4  | 15.8  | 2394.32 | 0.72 |
| 50 | IRMOF-74-III                       | 17.92 | 17.92 | 17.51 | 2791.94 | 0.86 |
| 51 | Meso-MOF-1                         | 25.46 | 25.46 | 15.65 | 1369.63 | 2.86 |
| 52 | MIL-53-Fe-Cl                       | 6.15  | 6.15  | 5.9   | 771.56  | 0.07 |
| 53 | MOF-48                             | 2.43  | 2.43  | 2     | 0       | 0    |
| 54 | MOF-73                             | 2.56  | 2.56  | 1.41  | 0       | 0    |
| 55 | MOF-112                            | 6.56  | 6.56  | 5.02  | 1450.76 | 0.1  |
| 56 | MOF-180                            | 15.41 | 14.77 | 13.34 | 4642.05 | 2.25 |
| 57 | MOF-399                            | 37.83 | 37.83 | 24.25 | 6069.4  | 6.56 |
| 58 | MOF-525                            | 4.49  | 4.15  | 1.95  | 3.83    | 0    |

|    |                        |       |        |       |         |       |
|----|------------------------|-------|--------|-------|---------|-------|
| 59 | MOF-604                | 2.87  | 2.85   | 2.17  | 0       | 0     |
| 60 | n.a.                   | 11.95 | 11.95  | 6.57  | 3067.45 | 0.57  |
| 61 | NOTT-119               | 21.39 | 20.91  | 11.87 | 5001.82 | 1.68  |
| 62 | NU-100                 | 28.66 | 28.66  | 11.54 | 5617.28 | 2.4   |
| 63 | PCMOF-5                | 2.22  | 2.21   | 1.29  | 0       | 0     |
| 64 | PCN-6'                 | 22.94 | 22.94  | 14.87 | 5012.71 | 2.47  |
| 65 | PCN-14                 | 6.82  | 6.82   | 5.02  | 3285.6  | 0.31  |
| 66 | PCN-20                 | 17.06 | 17.06  | 9.83  | 4266.07 | 1.14  |
| 67 | PCN-61                 | 18.72 | 18.72  | 5.21  | 4167.76 | 0.8   |
| 68 | PCN-66                 | 25.74 | 18.82  | 12.09 | 4288.77 | 0.98  |
| 70 | PCN-68                 | 23.24 | 15.12  | 8.24  | 4655.73 | 1.27  |
| 71 | PCN-69                 | 21.69 | 20.7   | 11.87 | 4621.68 | 1.49  |
| 72 | PCN-610                | 25.74 | 18.82  | 12.09 | 5653.93 | 2.28  |
| 73 | POST-1                 | 11.77 | 11.77  | 8.71  | 1444.94 | 0.25  |
| 74 | rho-ZMOF               | 13.65 | 13.65  | 1.07  | 0       | 0     |
| 75 | SIFSIX-3-Zn            | 4.12  | 4.12   | 3.34  | 485.64  | 0.02  |
| 76 | UiO-66-Br              | 7.89  | 7.88   | 2.83  | 594.63  | 0.05  |
| 77 | UiO-66-NH <sub>2</sub> | 7.9   | 7.9    | 3.41  | 1066.83 | 0.08  |
| 78 | UiO-66-NO <sub>2</sub> | 11.93 | 11.93  | 7.29  | 2141.98 | 0.49  |
| 79 | UTSA-200               | 2.93  | 2.93   | 2.49  | 348.37  | 0     |
| 80 | UTSA-280               | 3.81  | 3.81   | 3     | 545.82  | 0.01  |
| 81 | UTSA-300               | 3.99  | 3.97   | 1.74  | 0       | 0     |
| 82 | NU-108                 | 66.49 | 66.49  | 64.86 | 6876.81 | 12.58 |
| 83 | NU-109                 | 30.85 | 30.85  | 12.94 | 5625.56 | 3.21  |
| 84 | NU-111                 | 4.87  | 4.87   | 4.03  | 1236.09 | 0.07  |
| 85 | MOF-508                | 3.39  | 3.89   | 2.53  | 953.82  | 0.02  |
| 86 | MOF-1000               | 13.55 | 13.55  | 8.94  | 4109.47 | 0.88  |
| 87 | MOF-1140               | 11.74 | 111.74 | 8.03  | 2185.04 | 0.36  |
| 88 | CMOF-1                 | 9.21  | 9.21   | 7.07  | 8047.73 | 1.65  |
| 89 | CAUMOF-11              | 3.18  | 3.18   | 1.83  | 0       | 0     |
| 90 | UMCM-1                 | 23.9  | 0      | 0     | 4122.98 | 1.49  |
| 91 | UMCM-151               | 14.44 | 14.44  | 10.21 | 4806.44 | 1.21  |
| 92 | UMCM-152               | 13.86 | 13.86  | 5.24  | 4284.03 | 0.75  |
| 93 | IRMOF-9                | 7.64  | 7.63   | 0     | 2793.05 | 0.28  |
| 94 | SNU-50                 | 11.31 | 11.31  | 3.5   | 3047.13 | 0.35  |
| 95 | MIL-53-OH              | 6.68  | 6.68   | 6.47  | 1447.54 | 0.14  |
| 96 | MIL-88-NH <sub>2</sub> | 11.93 | 11.93  | 10.69 | 10075.1 | 3.33  |
| 97 | bio-MOF-100            | 8.83  | 8.83   | 5.03  | 1751.68 | 0.22  |
| 98 | bio-MOF-               | 1.65  | 0      | 0     | 0       | 0     |

|     |             |      |      |      |   |      |
|-----|-------------|------|------|------|---|------|
|     | 29          |      |      |      |   |      |
| 99  | bio-MOF-13  | 2.71 | 0    | 0    | 0 | 0    |
| 100 | bio-MOF-200 | 3.34 | 6.63 | 4.57 | 0 | 0.45 |

**Table S5:** N<sub>2</sub> adsorption enthalpy and saturation loading data on shortlisted 50 MOFs.

| Sl. No. | MOF          | N <sub>2</sub> adsorption enthalpy (kJ/mol) | N <sub>2</sub> saturation loading (mg/g) |
|---------|--------------|---------------------------------------------|------------------------------------------|
| 1       | CN-HTB'      | -6.05                                       | 0                                        |
| 2       | CD-MOF       | -13.76                                      | 6.21                                     |
| 3       | CPL-2        | -7.96                                       | 0.34                                     |
| 4       | CPM-7        | -16.04                                      | 8.48                                     |
| 5       | DUT-49       | -7.52                                       | 8.85                                     |
| 6       | F-MOF-6      | -14.69                                      | 8.01                                     |
| 7       | PCN-14       | -11.55                                      | 11.61                                    |
| 8       | HKUST-1      | -13.66                                      | 9.03                                     |
| 9       | IRMOF-5      | -8.54                                       | 5.3                                      |
| 10      | IRMOF-74     | -5.39                                       | 2.62                                     |
| 11      | IRMOF-76     | -7.7                                        | 10.05                                    |
| 12      | LIC-1        | -15.04                                      | 2.28                                     |
| 13      | MIL-47       | -9.96                                       | 3.74                                     |
| 14      | MIL-101      | -7.09                                       | 2.34                                     |
| 15      | MOF-5        | -7.94                                       | 5.65                                     |
| 16      | MOF-177      | -7.27                                       | 6.95                                     |
| 17      | MOF-200      | -6.27                                       | 9.26                                     |
| 18      | MOF-205      | -8.73                                       | 10                                       |
| 19      | MOF-210      | -6.01                                       | 8.46                                     |
| 20      | NOTT-119     | -8.69                                       | 9.85                                     |
| 21      | NU-108       | -8.57                                       | 7.3                                      |
| 22      | UiO-67       | -18.74                                      | 0.28                                     |
| 23      | UiO-68       | -2.48                                       | 16.24                                    |
| 24      | ZIF-8        | -11.68                                      | 5.64                                     |
| 25      | ZIF-67       | -11.52                                      | 5.62                                     |
| 26      | ZIF-70       | -16.22                                      | 10.82                                    |
| 27      | IRMOF-1      | -8.04                                       | 5.6                                      |
| 28      | IRMOF-3      | -9.06                                       | 5.58                                     |
| 29      | IRMOF-16     | -5.86                                       | 2.08                                     |
| 30      | IRMOF-18     | -11.17                                      | 9.3                                      |
| 31      | IRMOF-74-II  | -7.53                                       | 3.35                                     |
| 32      | IRMOF-74-III | -7.01                                       | 2.87                                     |
| 33      | IRMOF-77     | -2.49                                       | 1.17                                     |
| 34      | Meso-MOF-1   | -6.25                                       | 8.35                                     |
| 35      | MIL-53-Fe-Cl | -17.71                                      | 11.84                                    |
| 36      | MIL-88       | -12.56                                      | 2                                        |

|    |          |        |       |
|----|----------|--------|-------|
| 37 | MOF-180  | -6.18  | 7.57  |
| 38 | MOF-399  | -4.86  | 13.01 |
| 39 | MOF-525  | -9.81  | 4.09  |
| 40 | MOF-801  | -16.63 | 7.11  |
| 41 | MOF-1011 | -17.3  | 2.67  |
| 42 | MOF-1140 | -10.6  | 4.1   |
| 43 | n.a      | -8.41  | 4.71  |
| 44 | UiO-66   | -16.24 | 7.12  |
| 45 | ZIF-4    | -18.77 | 6.44  |
| 46 | ZIF-7    | -22.50 | 23.86 |
| 47 | MOF-112  | -16.18 | 5.75  |
| 48 | NU-100   | -7.95  | 9.51  |
| 49 | PCN-610  | -7.35  | 9.10  |
| 50 | PCN-61   | -9.85  | 8.91  |

**Table S6:** C<sub>2</sub>F<sub>4</sub> adsorption enthalpy and saturation loading data on shortlisted 50 MOFs:

| Sl. No. | MOF      | C <sub>2</sub> F <sub>4</sub> adsorption enthalpy (kJ/mol) | C <sub>2</sub> F <sub>4</sub> saturation loading (mg/g) |
|---------|----------|------------------------------------------------------------|---------------------------------------------------------|
| 1       | CN-HTB'  | -17.97                                                     | 371.94                                                  |
| 2       | CD-MOF   | -25.89                                                     | 323.3                                                   |
| 3       | CPL-2    | -18.86                                                     | 14.73                                                   |
| 4       | CPM-7    | -34.12                                                     | 293.16                                                  |
| 5       | DUT-49   | -21.5                                                      | 613                                                     |
| 6       | F-MOF-6  | -45.87                                                     | 344.89                                                  |
| 7       | PCN-14   | -37.12                                                     | 1072.73                                                 |
| 8       | HKUST-1  | -39.2                                                      | 750.81                                                  |
| 9       | IRMOF-5  | -20.07                                                     | 318.09                                                  |
| 10      | IRMOF-74 | -14.4                                                      | 46.22                                                   |
| 11      | IRMOF-76 | -20.92                                                     | 566.24                                                  |
| 12      | LIC-1    | -32.13                                                     | 145.43                                                  |
| 13      | MIL-47   | -30.28                                                     | 280.86                                                  |
| 14      | MIL-101  | -15.41                                                     | 68.80                                                   |
| 15      | MOF-5    | -26.69                                                     | 788.96                                                  |
| 16      | MOF-177  | -23.79                                                     | 816.59                                                  |
| 17      | MOF-200  | -17.9                                                      | 387.4                                                   |
| 18      | MOF-205  | -25.65                                                     | 1200.55                                                 |
| 19      | MOF-210  | -12.37                                                     | 305                                                     |
| 20      | NOTT-119 | -19.48                                                     | 686.87                                                  |
| 21      | NU-108   | -35.09                                                     | 1288.59                                                 |
| 22      | UiO-67   | -39.21                                                     | 175.25                                                  |
| 23      | UiO-68   | -42.35                                                     | 447.73                                                  |
| 24      | ZIF-8    | -39.35                                                     | 427.92                                                  |
| 25      | ZIF-67   | -38.02                                                     | 418.54                                                  |
| 26      | ZIF-70   | -24.67                                                     | 379.77                                                  |
| 27      | IRMOF-1  | -26.68                                                     | 775.48                                                  |

|    |              |         |                         |
|----|--------------|---------|-------------------------|
| 28 | IRMOF-3      | -27.49  | 690.44                  |
| 29 | IRMOF-16     | -13.34  | 21.65                   |
| 30 | IRMOF-18     | -38.58  | 786.91                  |
| 31 | IRMOF-74-II  | -18.38  | 127.47                  |
| 32 | IRMOF-74-III | -17.43  | 79.97                   |
| 33 | IRMOF-77     | -2.49   | 4.04                    |
| 34 | Meso-MOF-1   | -20.02  | 455.26                  |
| 35 | MIL-53-Fe-Cl | -47.66  | 179.81                  |
| 36 | MIL-88       | -30.92  | 113.74                  |
| 37 | MOF-180      | -16.42  | 253.02                  |
| 38 | MOF-399      | -14.84  | 307.44                  |
| 39 | MOF-525      | -22.70  | 266.94                  |
| 40 | MOF-801      | -41.84  | 260.42                  |
| 41 | MOF-1011     | -30.15  | 60.97                   |
| 42 | MOF-1140     | -26.39  | 381.62                  |
| 43 | n.a          | -30.31  | 667.14                  |
| 44 | UiO-66       | -43.81  | 174.44                  |
| 45 | ZIF-4        | -43.04  | 201.78 (up to 10000 Pa) |
| 46 | ZIF-7        | -39.65  | 204.19                  |
| 47 | MOF-112      | -38.165 | 254.88                  |
| 48 | NU-100       | -18.59  | 429.38                  |
| 49 | PCN-610      | -17.79  | 432.84                  |
| 50 | PCN-61       | -28.47  | 1039.98e                |

**Table S7:** C<sub>2</sub>F<sub>6</sub> adsorption enthalpy and saturation loading data on shortlisted 50 MOFs:

| SI. No. | MOF      | C <sub>2</sub> F <sub>6</sub> adsorption enthalpy (kJ/mol) | C <sub>2</sub> F <sub>6</sub> saturation loading (mg/g) |
|---------|----------|------------------------------------------------------------|---------------------------------------------------------|
| 1       | CN-HTB'  | -12.91                                                     | 120.16                                                  |
| 2       | CD-MOF   | -20.42                                                     | 154.69                                                  |
| 3       | CPL-2    | -15.27                                                     | 6.44                                                    |
| 4       | CPM-7    | -25.89                                                     | 160.17                                                  |
| 5       | DUT-49   | -17                                                        | 251.73                                                  |
| 6       | F-MOF-6  | -32.38                                                     | 183.96                                                  |
| 7       | PCN-14   | -29.77                                                     | 269.68                                                  |
| 8       | HKUST-1  | -28.07                                                     | 372.71                                                  |
| 9       | IRMOF-5  | -16.41                                                     | 139.45                                                  |
| 10      | IRMOF-74 | -11.2                                                      | 14.15                                                   |
| 11      | IRMOF-76 | -15.56                                                     | 246.06                                                  |
| 12      | LIC-1    | -30.54                                                     | 46.22                                                   |
| 13      | MIL-47   | -19.04                                                     | 89.3                                                    |
| 14      | MIL-101  | -10.02                                                     | 31.48                                                   |
| 15      | MOF-5    | -18.52                                                     | 220.24                                                  |
| 16      | MOF-177  | -15.74                                                     | 192.85                                                  |
| 17      | MOF-200  | -12.97                                                     | 147.57                                                  |
| 18      | MOF-205  | -18.52                                                     | 362.37                                                  |



|    |              |                |                       |
|----|--------------|----------------|-----------------------|
| 19 | MOF-210      | -12.89         | 117.79                |
| 20 | NOTT-119     | -15.81         | 240.36                |
| 21 | NU-108       | -21.64         | 432.38                |
| 22 | UiO-67       | -30.9          | 257.7                 |
| 23 | UiO-68       | -2.5           | 48.75 (up to 5000 Pa) |
| 24 | ZIF-8        | -30.76         | 218.71                |
| 25 | ZIF-67       | -29            | 198.78                |
| 26 | ZIF-70       | -21.17         | 207.45                |
| 27 | IRMOF-1      | -18.68         | 223.80                |
| 28 | IRMOF-3      | -21.72         | 297.65                |
| 29 | IRMOF-16     | -8.96          | 9.2                   |
| 30 | IRMOF-18     | -31.61         | 411.13                |
| 31 | IRMOF-74-II  | -13.83         | 51.56                 |
| 32 | IRMOF-74-III | -14.13         | 39.27                 |
| 33 | IRMOF-77     | -12.21         | 122.62                |
| 34 | Meso-MOF-1   | -15.06         | 162.73                |
| 35 | MIL-53-Fe-Cl | -35.11         | 108.29                |
| 36 | MIL-88       | -24.73         | 48.77                 |
| 37 | MOF-180      | -12.33         | 98.48                 |
| 38 | MOF-399      | -10.61         | 114.07                |
| 39 | MOF-525      | positive value | 130.5                 |
| 40 | MOF-801      | -36.52         | 124.73                |
| 41 | MOF-1011     | -34.29         | 20.94                 |
| 42 | MOF-1140     | -21.18         | 139.91                |
| 43 | n.a          | -21.26         | 241.95                |
| 44 | UiO-66       | -29.63         | 91.32                 |
| 45 | ZIF-4        | -34.9          | 91.87                 |
| 46 | ZIF-7        | -33.25         | 139.18                |
| 47 | MOF-112      | -28.43         | 114.09                |
| 48 | NU-100       | -12.56         | 181.32                |
| 49 | PCN-610      | -14.78         | 181.29                |
| 50 | PCN-61       | -21.05         | 324.62                |

**Table S8:** C<sub>2</sub>F<sub>4</sub> and C<sub>2</sub>F<sub>6</sub> adsorption enthalpies from UFF-based GCMC simulations.

| SI. No. | MOF     | C <sub>2</sub> F <sub>4</sub> adsorption enthalpy (kJ/mol) | C <sub>2</sub> F <sub>6</sub> adsorption enthalpy (kJ/mol) |
|---------|---------|------------------------------------------------------------|------------------------------------------------------------|
| 1       | MIL-47  | -30.27                                                     | -27.34                                                     |
| 2       | DUT-49  | -21.5                                                      | -19.66                                                     |
| 3       | IRMOF-5 | -20.07                                                     | -16.41                                                     |
| 4       | ZIF-7   | -39.65                                                     | -40.07                                                     |
| 5       | F-MOF-6 | -45.87                                                     | -43.79                                                     |

**DFT Calculations:**

The binding of MOFs (MIL-53-Fe and MIL-53-Fe-Cl) with C<sub>2</sub>F<sub>4</sub> refrigerant is investigated within the framework of periodic density functional theory (DFT)<sup>1</sup> using the SIESTA package<sup>2</sup>. We first optimized the MOF crystal structures by fully relaxing their lattice parameters. The fully relaxed MOFs were subjected to C<sub>2</sub>F<sub>4</sub> adsorption, computing binding strength and observing characteristic changes due to refrigerant binding. The generalized gradient approximation parameterized by the Perdew-Burke-Ernzerhof functional (GGA-PBE)<sup>3</sup> was used for all calculations to consider exchange and correlation energies. The DFT-D<sup>2</sup> method was employed to treat van der Waals interactions. The non-relativistic Troullier-Martins pseudopotentials for all molecules were taken from the FHI pseudopotential database<sup>5</sup>. We took the mesh cutoff of 350 Ry for the Fourier expansion of the electron density in a 1 × 1 × 1 unit cell. The binding energies were determined using the formula  $\Delta E = \Delta E_{\text{MOF} + \text{refrigerant}} - \Delta E_{\text{MOF}} - \Delta E_{\text{refrigerant}}$  for C<sub>2</sub>F<sub>4</sub> refrigerant, where  $E$  represents the system's overall energy.  $E_{\text{MOF}}$ ,  $E_{\text{refrigerant}}$ , and  $E_{\text{MOF} + \text{refrigerant}}$  are the energy of the bare MOF without the guest molecule, refrigerant molecule in the gas phase, and MOF with an adsorbed refrigerant molecule, respectively.

## References:

- 1 Kohn, W. & Sham, L. J. Self-Consistent Equations Including Exchange and Correlation Effects. *Phys. Rev.* **140**, A1133-A1138, doi:10.1103/PhysRev.140.A1133 (1965).
- 2 Soler, J. M. *et al.* The SIESTA method for *ab initio* order-*N* materials simulation. *J. Phys.: Condens. Matter* **14**, 2745-2779, doi:10.1088/0953-8984/14/11/302 (2002).
- 3 Perdew, J. P., Burke, K. & Ernzerhof, M. Generalized Gradient Approximation Made Simple. *Phys. Rev. Lett.* **77**, 3865-3868, doi:10.1103/PhysRevLett.77.3865 (1996).
- 4 Grimme, S. Semiempirical GGA-type density functional constructed with a long-range dispersion correction. *Journal of Computational Chemistry* **27**, 1787-1799, doi:10.1002/jcc.20495 (2006).
- 5 SIESTA (Spanish Initiative for Electronic Simulations with Thousands of Atoms).
